# Supplementary material for: In situsynthesis of novel type II BiOCl/CAU-17 2D/2D heterostructures with enhanced photocatalytic activity
Source: Royal Society of Chemistry journal article supplement (doi:10.1039/d2dt01489k), 2022-01-01
Supplement: d2dt01489k1.pdf [file d2dt01489k1.pdf]

# Supporting information

## In situ synthesis of novel type II BiOCl/CAU-17 2D/2D heterostructures with enhanced photocatalytic activity

Feihu Zhang,<sup>a</sup> Xinyan Xiao<sup>a\*</sup> and Yu Xiao<sup>b</sup>

a. School of Chemistry and Chemical Engineering, Guangdong Provincial Key Lab of Green Chemical Product Technology, South China University of Technology, Guangzhou 510640, China;

b. Department of Mechanical Engineering, University of Manitoba, Winnipeg, R3T 2N2, Canada

Table S1 Crystallite size of BiOCl and 70% BiOCl/CAU-17 composite calculated by Debye-Scherrer equation

| (hkl)<br>planes | BiOCl          |                  |           |                 | 70% BiOCl/CAU-17 |                  |           |                 |
|-----------------|----------------|------------------|-----------|-----------------|------------------|------------------|-----------|-----------------|
|                 | 2θ<br>(degree) | FWHM<br>(degree) | d<br>(nm) | Aver. d<br>(nm) | 2θ<br>(degree)   | FWHM<br>(degree) | d<br>(nm) | Aver. d<br>(nm) |
| (001)           | 12.04          | 0.327            | 24.16     |                 | 12.11            | 1.019            | 7.75      |                 |
| (101)           | 25.93          | 0.211            | 38.21     |                 | 25.97            | 0.821            | 9.82      |                 |
| (110)           | 32.54          | 0.158            | 51.80     | 39.88           | 32.62            | 0.399            | 20.51     | 13.10           |
| (200)           | 46.72          | 0.180            | 47.54     |                 | 46.81            | 0.492            | 17.40     |                 |
| (212)           | 58.66          | 0.239            | 37.70     |                 | 58.83            | 0.902            | 10.00     |                 |

The Debye-Scherrer formula is as follows:

$$D = K\lambda/(\beta\cos\theta)$$

In the above equation,  $D$  (nm) refers to the crystallite size of the particle,  $K$  means the Scherrer constant (0.89),  $\lambda$  represents the wavelength of the X-ray sources (0.15406 nm),  $\beta$  stands for the full-width-at-half-maximum (FWHM) of the plane,  $\theta$  represents the diffraction angle.

\* Corresponding author.  
E-mail: [cexyxiao@scut.edu.cn](mailto:cexyxiao@scut.edu.cn) (X. Xiao)
